# Supplementary material for: KCa3.1 inhibition switches the phenotype of glioma-infiltrating microglia/macrophages
Source: PubMed Central journal article supplement (PMC4855657; doi:10.1038/cddis.2016.73), 2016-04-07

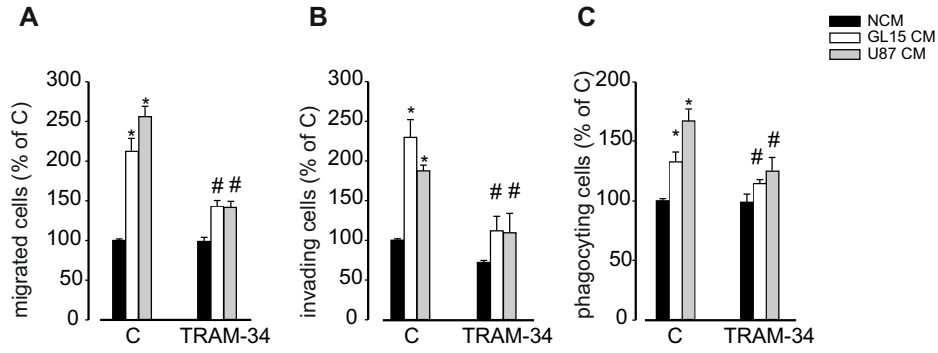

Supplement: cddis201673x5.pdf [file cddis201673x5.pdf]
